# Supplementary material for: Exploring Physicians’ Perspectives on the Introduction of Complementary Foods to Infants and Toddlers
Source: MDPI journal article supplement (doi:10.3390/nu13103559), 2021-10-12
Supplement: s1 [file s1]

**Supplementary Table S1.** Questions form survey exploring physicians' perspectives on the introduction of complementary foods to infants and toddlers.

| Questions                                                                                             | Possible Answers                                                                                                                                                                                                                                                                                                                                                  |
|-------------------------------------------------------------------------------------------------------|-------------------------------------------------------------------------------------------------------------------------------------------------------------------------------------------------------------------------------------------------------------------------------------------------------------------------------------------------------------------|
| How often do parents ask you about infant nutrition?                                                  | never<br>sporadically (e.g., single questions per month)<br>often (e.g., every third or fourth parent)                                                                                                                                                                                                                                                            |
| How often do you ask parents about infant nutrition?                                                  | never<br>sporadically (e.g., single questions per month)<br>often (e.g., every third or fourth parent)                                                                                                                                                                                                                                                            |
| The most common questions asked by parents about weaning are (multiple choice):                       | number and volume of meals<br>age (e.g., month) of introducing complementary foods<br>order in which complementary foods should be introduced<br>time of weaning<br>way of feeding (e.g., BLW)<br>consistency of the introduced foods<br>differences between ready-made and homemade foods<br>children's drinks (e.g., juices or water)<br>other (please specify) |
| In your opinion, parents lack knowledge about (multiple choice):                                      | number and volume of meals<br>age (e.g., month) of introducing complementary foods<br>order in which complementary foods should be introduced<br>time of weaning<br>way of feeding (e.g., BLW)<br>consistency of the introduced foods<br>differences between ready-made and homemade foods<br>children's drinks (e.g., juices or water)<br>other (please specify) |
| Where do parents most often get knowledge about infant nutrition, in your opinion? (multiple choice)  | from the doctor<br>from a nurse or midwife<br>from other parents<br>from family members<br>from the Internet<br>from parenting guides                                                                                                                                                                                                                             |
| Do you find it difficult to convince families to follow your advice on feeding babies during weaning? | no<br>yes                                                                                                                                                                                                                                                                                                                                                         |
| Do you think parents consider you an authority on infant nutrition?                                   | no<br>yes                                                                                                                                                                                                                                                                                                                                                         |
| When it comes to infant nutrition, do you think parents expect from you mainly:                       | scientific knowledge<br>emotional support                                                                                                                                                                                                                                                                                                                         |
| In your opinion, weaning practices:                                                                   | have a solid scientific basis<br>are mainly based on empirical knowledge                                                                                                                                                                                                                                                                                          |
| Do you think that nutrition during the first year of life can affect health in adulthood?             | no<br>yes (please specify)                                                                                                                                                                                                                                                                                                                                        |

|                                                                               |                                                                                                                                                                                   |
|-------------------------------------------------------------------------------|-----------------------------------------------------------------------------------------------------------------------------------------------------------------------------------|
| Where do you mainly get your knowledge of infant nutrition from?              | from the knowledge gained during studies and specialization<br>from previous experience<br>from scientific and training conferences<br>from national and international guidelines |
| Do you consider your knowledge of infant nutrition sufficient and up-to-date? | no<br>yes                                                                                                                                                                         |
| At weaning, usually do you suggest homemade food or commercial baby food?     | homemade food<br>ready-to-eat commercial products commercial food<br>(please specify why)                                                                                         |
